# Supplementary material for: WRKY Transcription Factors Associated With NPR1-Mediated Acquired Resistance in Barley Are Potential Resources to Improve Wheat Resistance to Puccinia triticina
Source: PubMed Central journal article supplement (PMC6199750; doi:10.3389/fpls.2018.01486), 2018-10-17
Supplement: Image_1.pdf [file Image_1.pdf]

Pearson correlation between samples

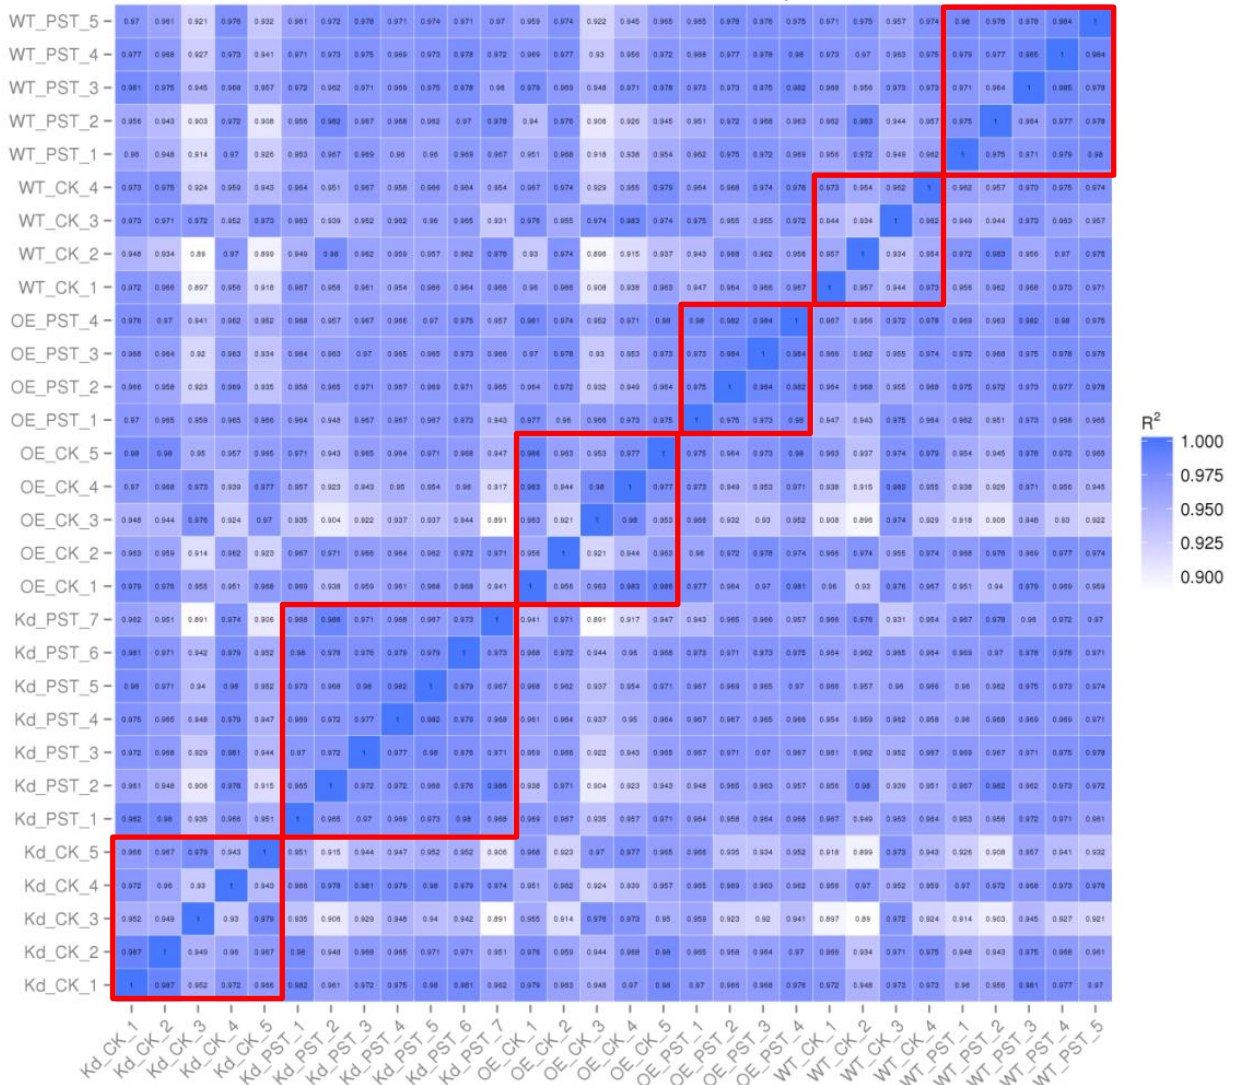

**Supplementary Figure S1.** Pearson's correlation of gene expression levels between biological replicates in the present RNA-seq assay. A number of 4-7 biological replicates of each treatment and genotype combination were included in the analysis. A clear correlation of gene expression level between biological replicates was observed ( $R^2 > 0.92$ ). CK, water infiltration control; PST, *P. syringae* DC3000 infiltration; OE, wNPR1-OE transgenic line; Kd, HvNPR1-Kd transgenic line.
