# Supplementary material for: WRKY Transcription Factors Associated With NPR1-Mediated Acquired Resistance in Barley Are Potential Resources to Improve Wheat Resistance to Puccinia triticina
Source: PubMed Central journal article supplement (PMC6199750; doi:10.3389/fpls.2018.01486), 2018-10-17
Supplement: Image_2.pdf [file Image_2.pdf]

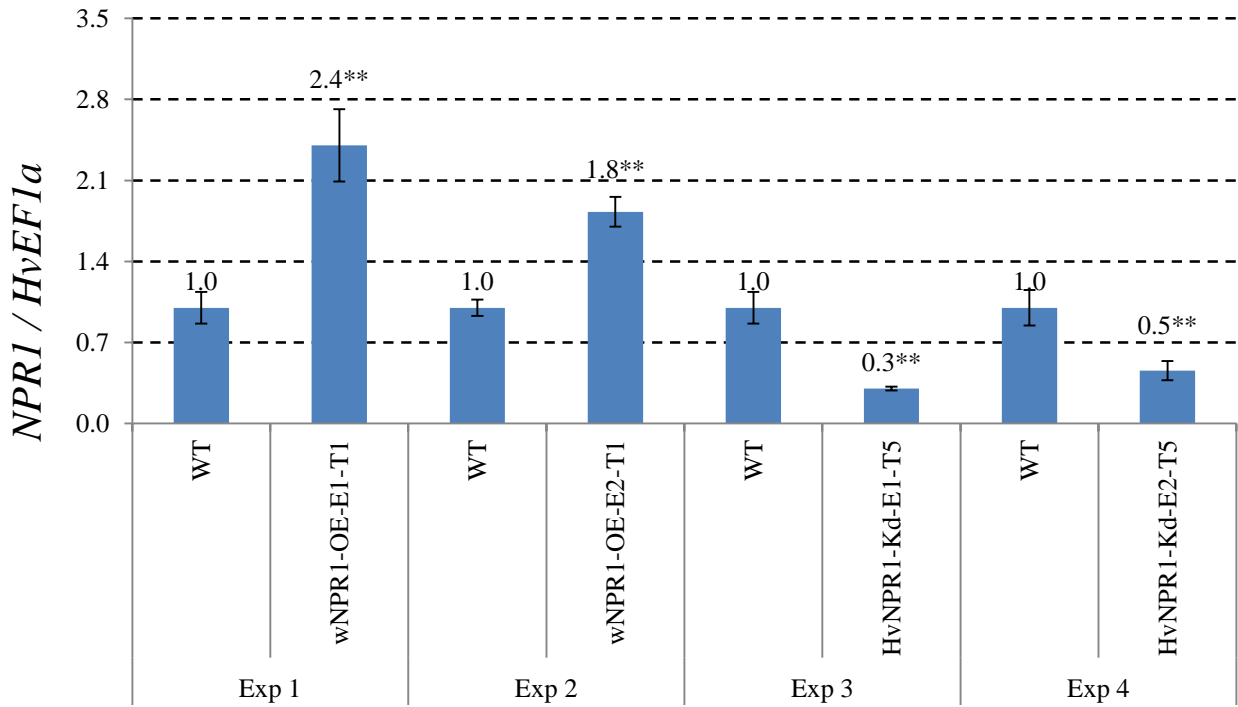

**Supplementary Figure S2.** Transcription levels of *NPR1* in the barley transgenic lines wNPR1-OE and HvNPR1-Kd and the wild-type plants measured by qRT-PCR. Transcript levels are expressed relative to those of the endogenous control *HvEF1a* using the  $2^{-\Delta CT}$  method. Each experiment, consisting of 4-11 biological replicates, was considered as a block. Calculations of the mean and standard error were performed using Microsoft Excel software. Data were transformed to restore normality, and two-sample t-test (\*\*  $P < 0.01$ ) was conducted using SAS software version 9.4.
