# Supplementary material for: WRKY Transcription Factors Associated With NPR1-Mediated Acquired Resistance in Barley Are Potential Resources to Improve Wheat Resistance to Puccinia triticina
Source: PubMed Central journal article supplement (PMC6199750; doi:10.3389/fpls.2018.01486), 2018-10-17
Supplement: Image_4.pdf [file Image_4.pdf]

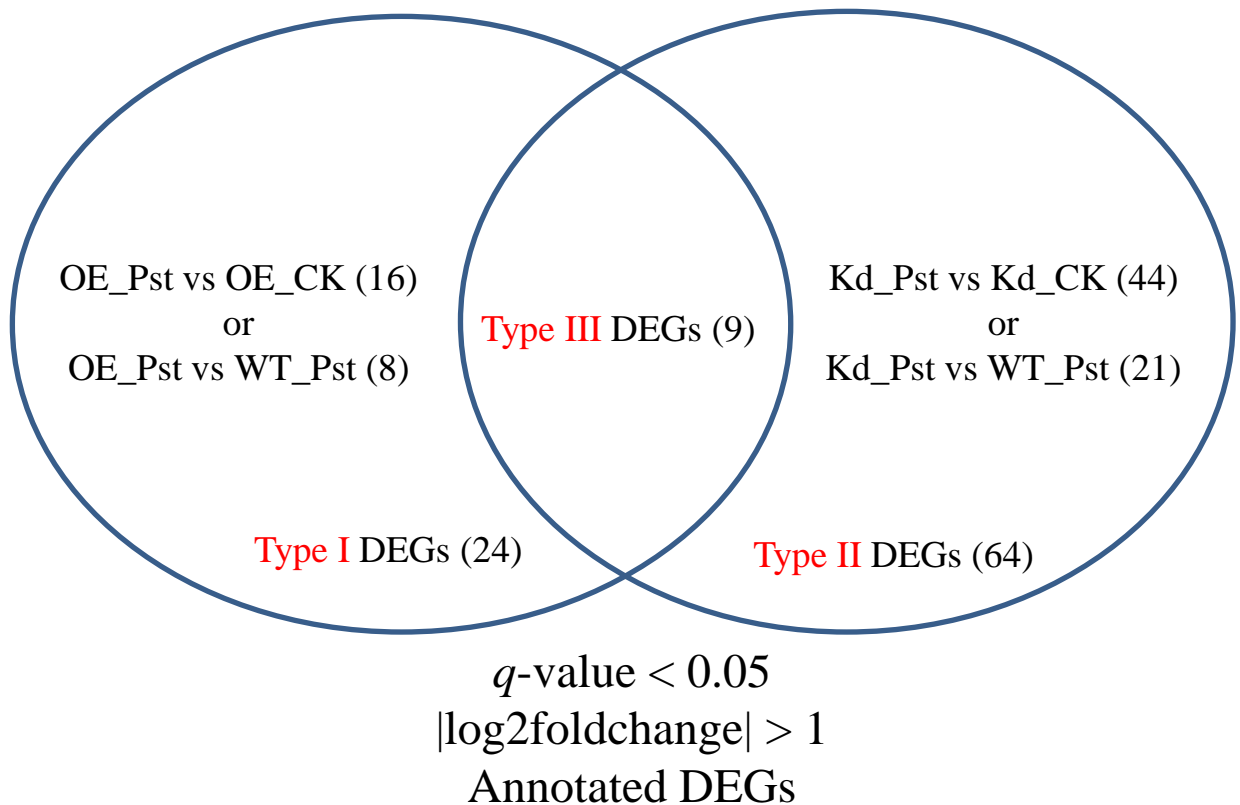

**Supplementary Figure S4.** Three types of DEGs were manually classified based on their possible roles in the *NPR1*-mediated AR. DEGs were identified by DESeq2 ( $q\text{-value} < 0.05$  and  $|\log_2\text{foldchange}| > 1$ , with gene annotation). Type I DEGs were designated from significantly upregulated genes from comparisons “OE\_PST vs OE\_CK” and “OE\_PST vs WT\_PST”. Type II DEGs were designated from significantly upregulated genes from comparisons “Kd\_PST vs Kd\_CK” and “Kd\_PST vs WT\_PST”. A third group of Type III DEGs were shared DEGs from Type I and Type II groups. CK, water infiltration control; PST, *P. syringae* DC3000 infiltration; OE, wNPR1-OE transgenic line; Kd, HvNPR1-Kd transgenic line.
