# Supplementary material for: WRKY Transcription Factors Associated With NPR1-Mediated Acquired Resistance in Barley Are Potential Resources to Improve Wheat Resistance to Puccinia triticina
Source: PubMed Central journal article supplement (PMC6199750; doi:10.3389/fpls.2018.01486), 2018-10-17
Supplement: Image_5.pdf [file Image_5.pdf]

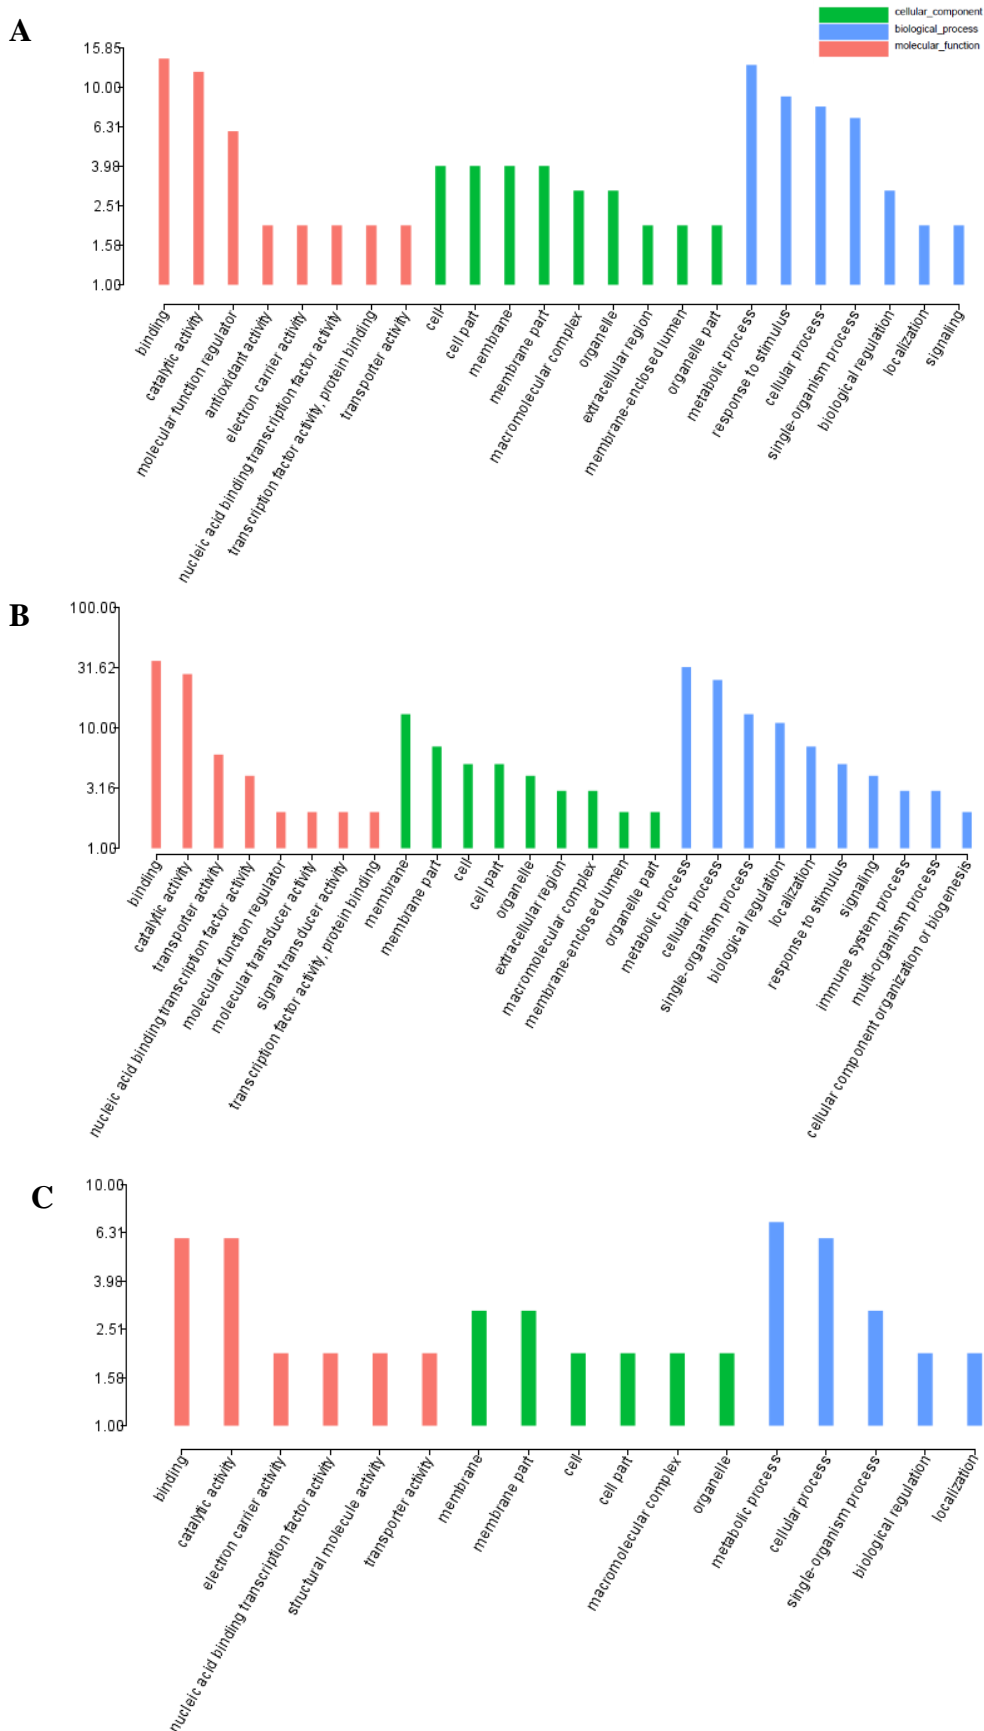

**Supplementary Figure S5.** GO annotation for DEGs. All the Type I (A), Type II (B), and Type III (C) DEGs were categorized by their GO annotations into different functional groups of three main categories: biological process, cellular component, and molecular function. The y-axis indicates the percentage of genes in a category.
